# Supplementary material for: Development of Au Nanoparticle Two-Dimensional Assemblies Dispersed with Au Nanoparticle-Nanostar Complexes and Surface-Enhanced Raman Scattering Activity
Source: MDPI journal article supplement (doi:10.3390/nano14090764), 2024-04-26
Supplement: s1 [file s1]

# **Development of Structures with Complexes of Au Nanoparticles and Au Nanostars Dispersed within Au Nanoparticle Two-Dimensional Assemblies and Surface-Enhanced Raman Scattering Activity**

Kosuke Sugawa<sup>1,\*</sup>, Kaichi Ono<sup>1</sup>, Ritsurai Tomii<sup>1</sup>, Yuka Hori<sup>1</sup>, Yu Aoki<sup>1</sup>, Koki Honma<sup>1</sup>, Kaoru Tamada<sup>2</sup>, Joe Otsuki<sup>1</sup>

<sup>1</sup>Department of Materials and Applied Chemistry, College of Science and Technology, Nihon University, Kanda-Surugadai, Chiyoda-ku, Tokyo 101-8308, Japan

<sup>2</sup>Institute for Materials Chemistry and Engineering (IMCE), Kyushu University, 744 Motooka, Nishiku, Fukuoka 819-0395, Japan

\*Correspondence: [sugawa.kosuke@nihon-u.ac.jp](mailto:sugawa.kosuke@nihon-u.ac.jp)

- 1. Morphologies of AuNPs, AuNSs, and AuNPs/AuNSs complexes**
- 2. Time-dependent extinction spectra of the water/BuOH solution**
- 3. Comparison of morphologies through AFM observations between individual AuNPs and AuNSs, and AuNP/AuNS-in-assemblies**
- 4. Peak assignments of SERRS spectrum of ICG-modified AuNP/AuNS-in-assemblies**
- 5. Chemical robustness (stability against solvents) of the AuNP/AuNS-in-assemblies**

## 1. Morphologies of AuNPs, AuNSs, and AuNPs/AuNSs complexes

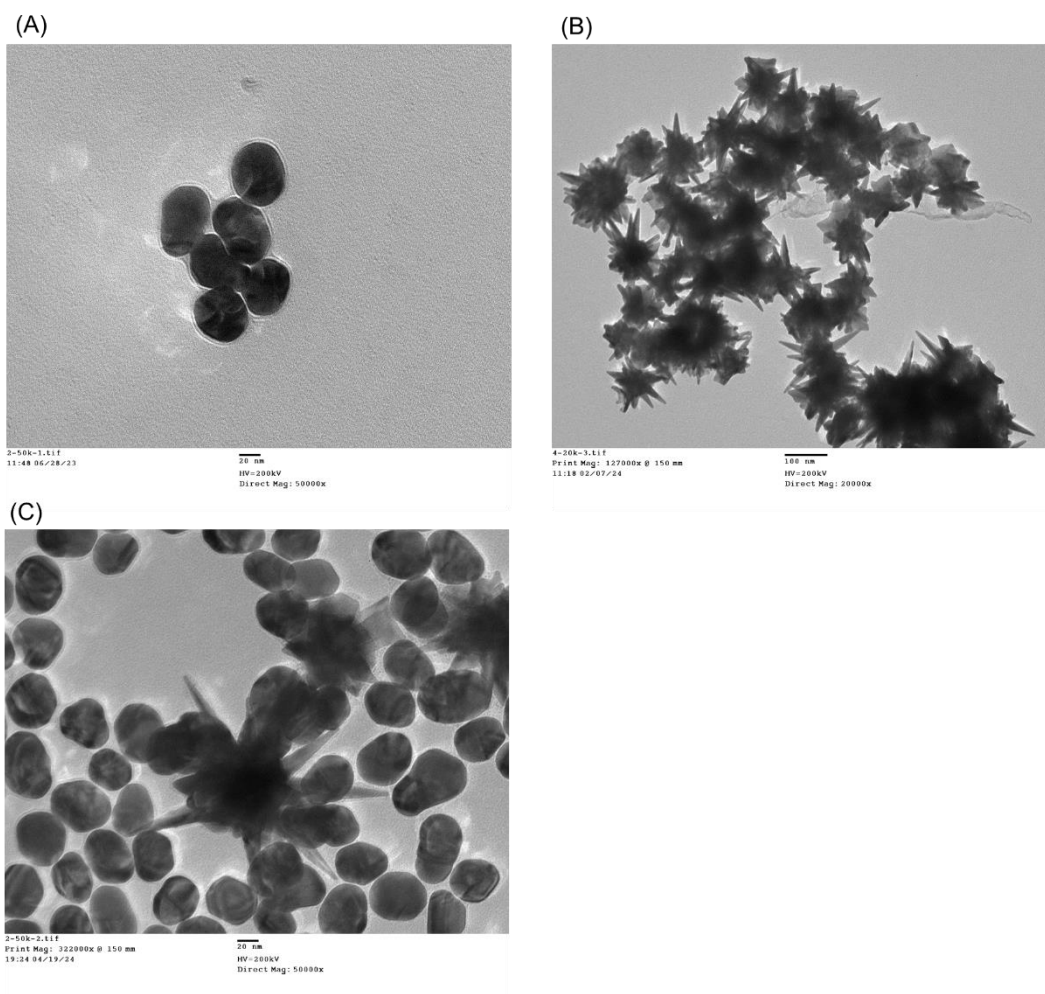

**Figure S1.** TEM images of (A) AuNPs, (B) AuNSs, and (C) AuNPs/AuNSs complexes.

## 2. Time-dependent extinction spectra of the water/BuOH solution

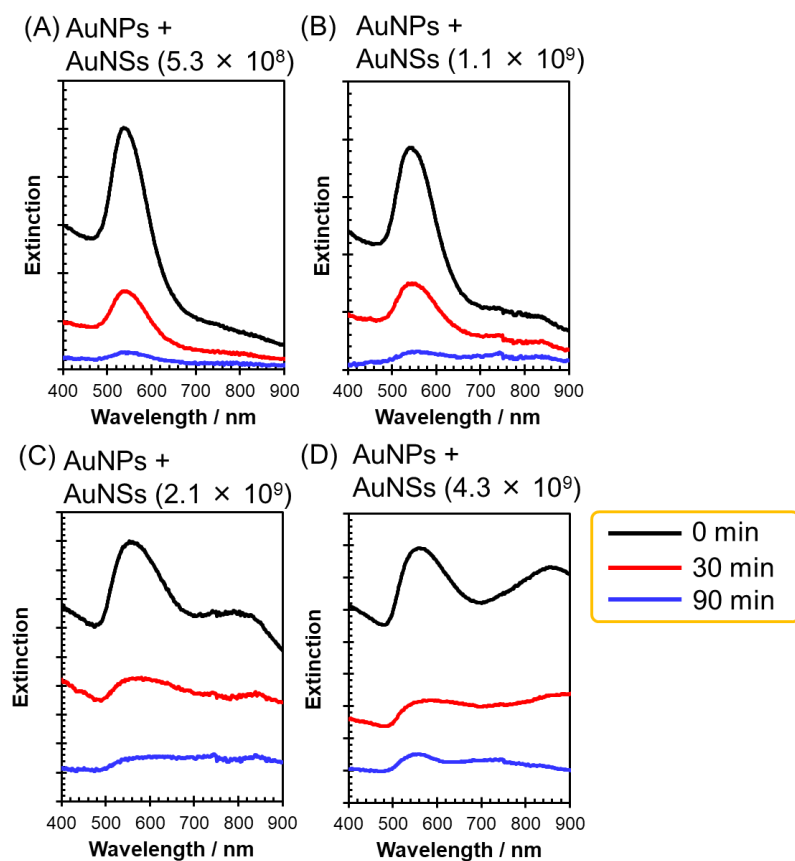

**Figure S2.** Time-dependent extinction spectra of the water/BuOH solution containing AuNSs (quantity:  $5.5 \times 10^{11}$ ) and AuSTs (quantity: (A)  $5.3 \times 10^8$ , (B)  $1.1 \times 10^8$ , (C)  $2.1 \times 10^9$ , (D)  $4.3 \times 10^9$ ).

### 3. Comparison of morphologies through AFM observations between individual AuNPs and AuNSs, and AuNP/AuNS-in-assemblies

The dispersed AuNPs and AuNSs immobilized on quartz substrates (Figure S3(A) and (B)) were prepared utilizing electrostatic interactions between the quartz substrate modified with polymer electrolytes and these nanoparticles, following previous reports.<sup>S1</sup> From the cross-sectional analysis of these nanoparticles, the average height profiles of AuNPs and AuNSs were determined to be  $43 \pm 3.2$  nm and  $95 \pm 9.0$  nm, respectively. It was observed that the average height profiles of the dispersed materials in AuNPs assemblies (Figure S3(C):  $143 \pm 4.6$  nm and (D):  $152 \pm 12$  nm) were significantly larger than these values.

(A) AuNPs-immobilized

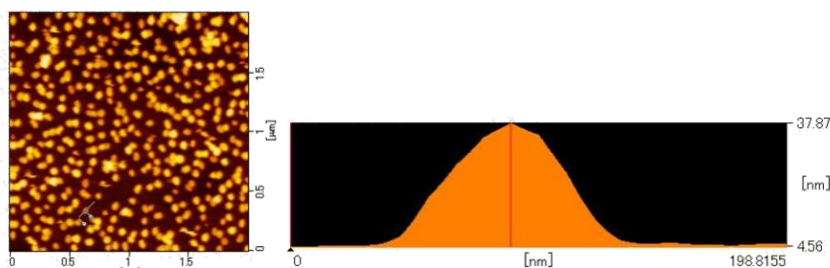

(B) AuNSs-immobilized

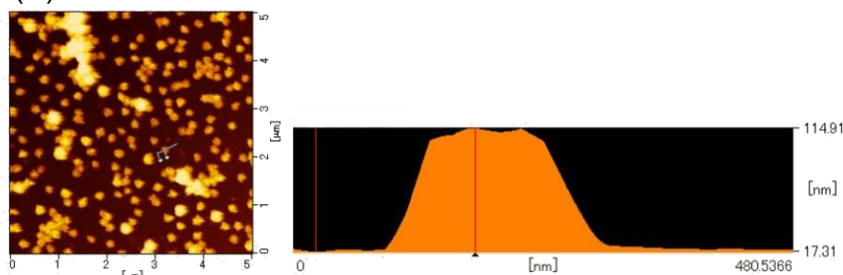

(C) AuNPs + AuNSs ( $5.3 \times 10^8$ )

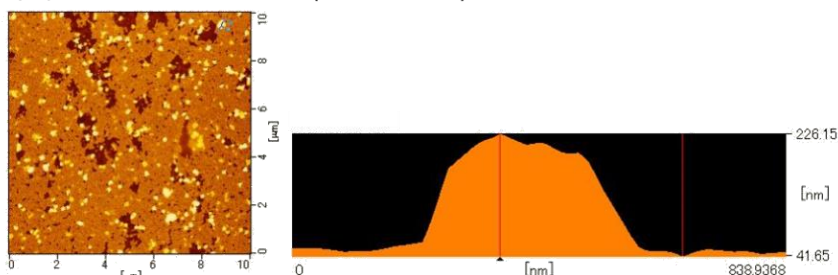

(D) AuNPs + AuSTs ( $1.1 \times 10^9$ )

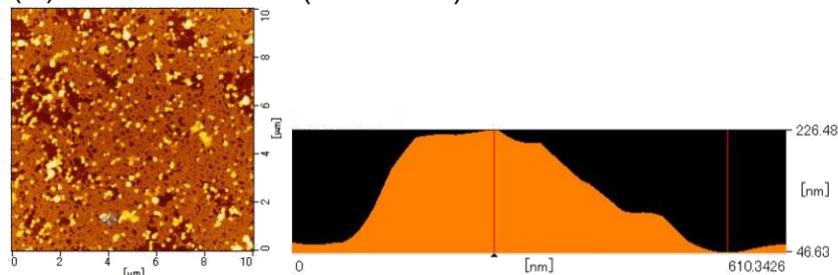

**Figure S3.** AFM images and cross-sectional analyses for (A) AuNPs-immobilized quartz substrate, (B) AuNSs-immobilized quartz substrate, (C) AuNPs + AuNSs( $5.3 \times 10^8$ ), and (D) AuNPs + AuNSs( $1.1 \times 10^9$ ).

#### 4. Peak assignments of SERRS spectrum of ICG-modified AuNP/AuNS-in-assemblies

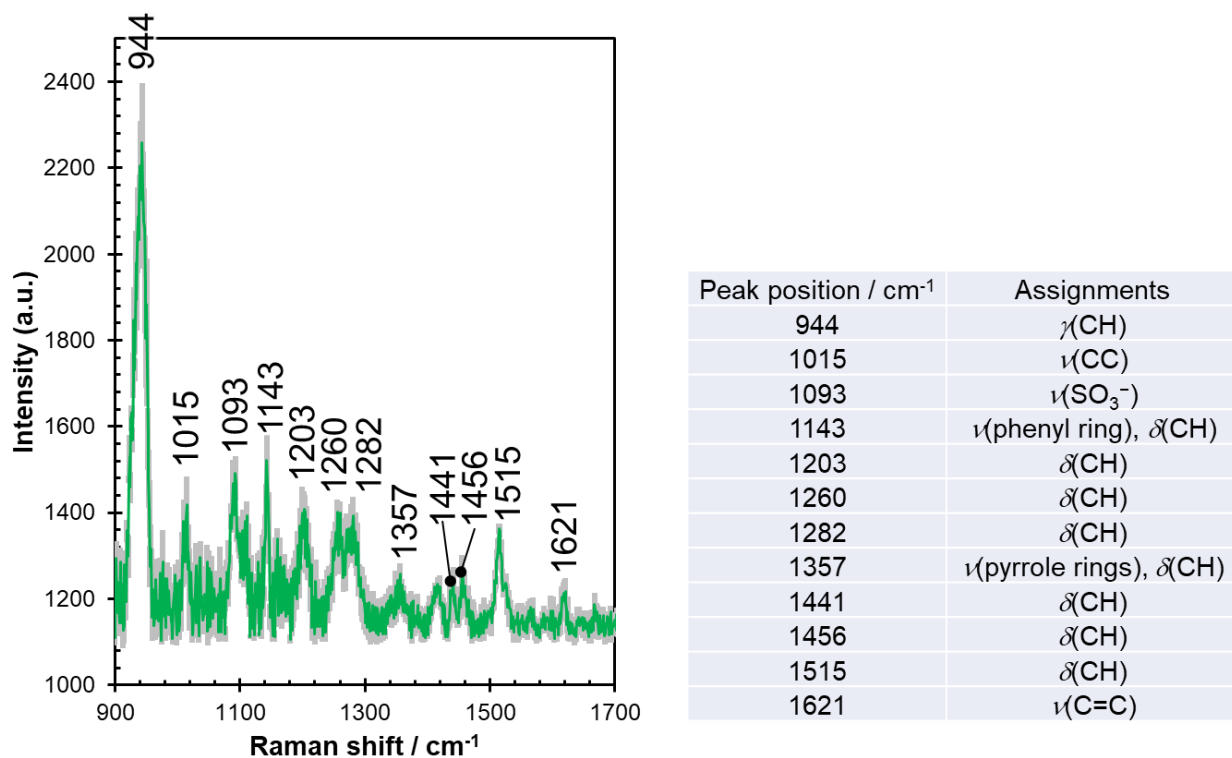

**Figure S4.** Peak assignments of SERRS spectrum of ICG-modified AuNP/AuNS-in-assemblies, which were obtained from a colloidal solution containing AuNPs and  $1.1 \times 10^9$  AuNSs.

## 5. Chemical robustness (stability against solvents) of the AuNP/AuNS-in-assemblies

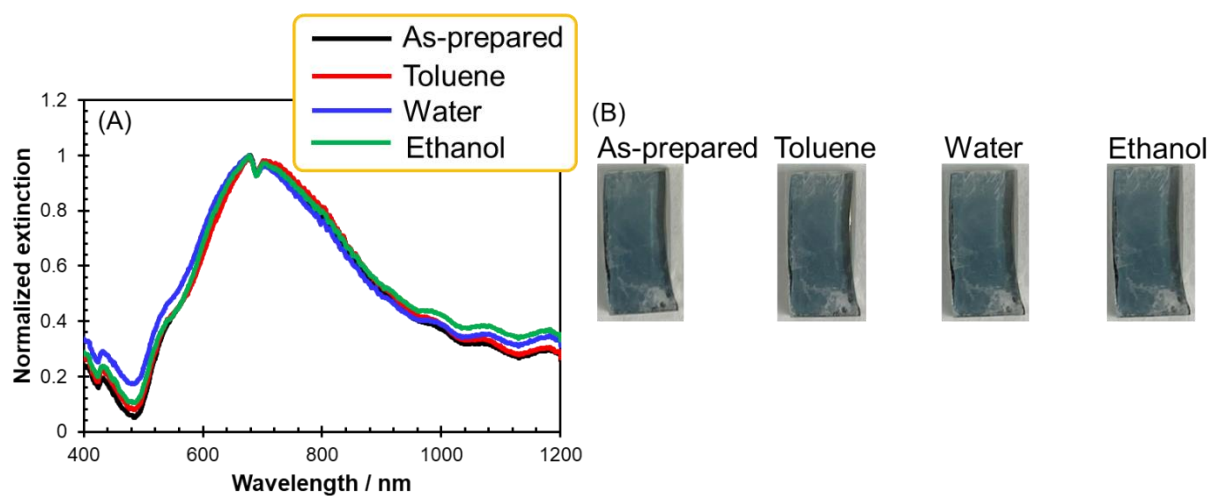

**Figure S5.** (A) Extinction spectra of AuNP/AuNS-in-assemblies obtained from a colloidal solution containing  $5.5 \times 10^{11}$  AuNPs and  $1.1 \times 10^9$  AuNSs. The spectra are shown for the assemblies immediately after preparation (as-prepared) and after washing with toluene, water, and ethanol. (B) The picture images show the assemblies immediately after preparation (as-prepared) and after washed with toluene, water, and ethanol.

## References

S1. Sugawa, K.; Takeshima, N.; Uchida, K.; Tahara, H.; Jin, S.; Tsunenari, N.; Akiyama, T.; Kusaka, Y.; Fukuda, N.; Ushijima, H.; Tsuchido, Y.; Hashimoto, T.; Hayashita, T.; Otsuki, J. Photocurrent enhancement of porphyrin molecules over a wide-wavelength region based on combined use of silver nanoprisms with different aspect ratios. *J. Mater. Chem. C* **2015**, 3, 11439-11448. doi: 10.1039/C5TC02606G.
